# Supplementary material for: Applications of Light-Based 3D Bioprinting and Photoactive Biomaterials for Tissue Engineering
Source: MDPI journal article supplement (doi:10.3390/ma16237461), 2023-11-30
Supplement: s1 [file s1]

# **Applications of Light-Based 3D Bioprinting and Photoactive Biomaterials for Tissue Engineering**

Xueqin Zhang <sup>1,\*</sup>, Xin Zhang <sup>1</sup>, Ying Li <sup>1</sup> and Yuxuan Zhang <sup>2,\*</sup>

<sup>1</sup> College of Chemistry and Materials Engineering, Beijing Technology and Business University, Beijing 100048, China

<sup>2</sup> FuYang Sineva Materials Technology Co., LTD., Beijing 100176, China

\* Correspondence: zhangxueqin@btbu.edu.cn (X.Z.);  
zhangyuxuan@sineva.com.cn (Y.Z.)

## **CONTENTS**

|                                                                                                                                  |    |
|----------------------------------------------------------------------------------------------------------------------------------|----|
| <b>Figure S1.</b> Structure of HAMA .....                                                                                        | S3 |
| <b>Figure S2.</b> Structures of maleiated sodium hyaluronate (MHA) and thiolated sodium hyaluronate (SHHA) [1].....              | S3 |
| <b>Figure S3.</b> Structure of methacrylated gelatin (GelMA) [2].....                                                            | S4 |
| <b>Figure S4.</b> Structure of methacrylated chitosan [3].....                                                                   | S4 |
| <b>Figure S5.</b> Structure of poly(ethylene glycol) diacrylate (PEGDA).....                                                     | S4 |
| <b>Figure S6.</b> Structure of dimethyl acrylamide (DMAAm). .....                                                                | S5 |
| <b>Figure S7.</b> Structure of methylene bis-acrylamide (MBAAm).....                                                             | S5 |
| <b>Figure S8.</b> Structure of ninylpyrrolidone (NVP).....                                                                       | S5 |
| <b>Figure S9.</b> Structure of gelatin [4].....                                                                                  | S6 |
| <b>Figure S10.</b> Synthetic routine of allyl glycidyl ether (AGE) modified gelatin [5]....                                      | S6 |
| <b>Figure S11.</b> Structure of chitosan.....                                                                                    | S6 |
| <b>Figure S12.</b> Structure of glycol chitosan (GC) [6].....                                                                    | S7 |
| <b>Figure S13.</b> Structure of methacrylated GC (MeGC) [7].....                                                                 | S7 |
| <b>Figure S14.</b> Structure of alginate [8].....                                                                                | S7 |
| <b>Figure S15.</b> Synthetic routine of methacrylated alginate (Alg-MA) treating the secondary hydroxyl groups with MAA [9]..... | S8 |
| <b>Figure S16.</b> The synthetic routine of oxidized and methacrylated alginates (OMA) [10].....                                 | S8 |
| <b>Figure S17.</b> Structure of norbornene functionalized alginate [11].....                                                     | S9 |

|                                                                                                                                                            |     |
|------------------------------------------------------------------------------------------------------------------------------------------------------------|-----|
| <b>Figure S18.</b> Structure of phenyl group functionalized alginate (Alg-Ph) [12].                                                                        | S9  |
| <b>Figure S19.</b> Structure of RGD Peptide Sequence (CGGGRGDS) [11].                                                                                      | S9  |
| <b>Figure S20.</b> Structure of hyaluronan N-acetyl-D-glucosamine and $\beta$ -D-glucuronic acid linked by $\beta$ -1,3 and $\beta$ -1,4 glycosidic bonds. | S10 |
| <b>Figure S21.</b> Structure of dopamine-conjugated maleic hyaluronic acid (DMHA) [13].                                                                    | S10 |
| <b>Figure S22.</b> Structure of tyramine-functionalized hyaluronic acid (HA-Tyr) [14].                                                                     | S10 |
| <b>RERERENCES</b>                                                                                                                                          | S10 |

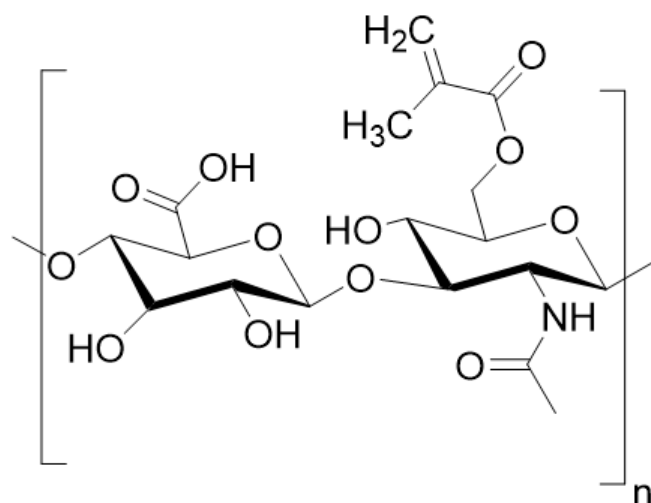

**Figure S1.** Structure of HAMA.

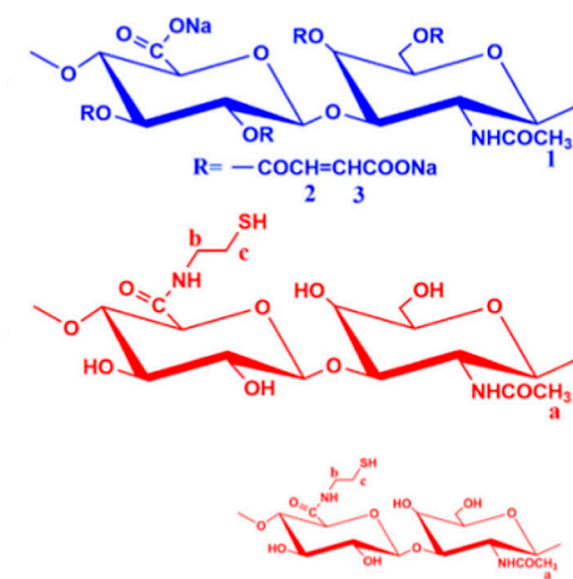

**Figure S2.** Structures of maleated sodium hyaluronate (MHA) and thiolated sodium hyaluronate (SHHA) [1].

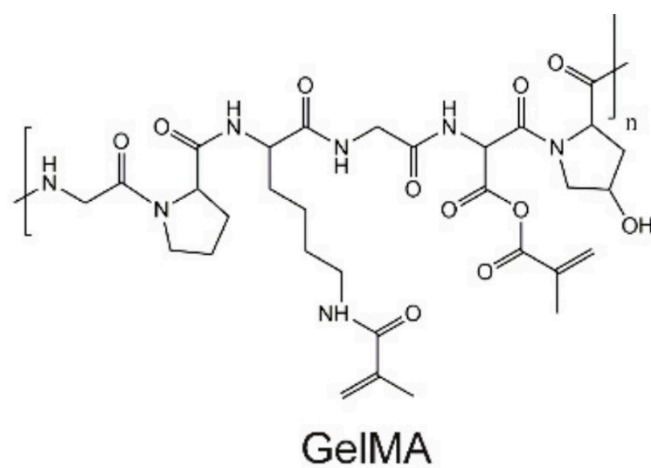

**Figure S3.** The chemical structure of methacrylated gelatin (GelMA) [2].

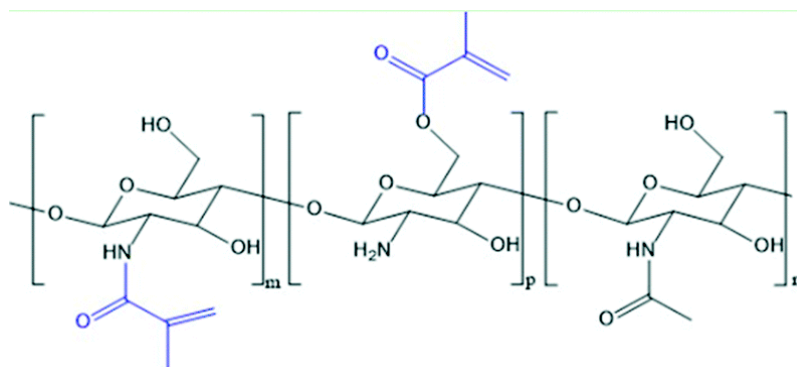

**Figure S4.** Structure of methacrylated chitosan [3].

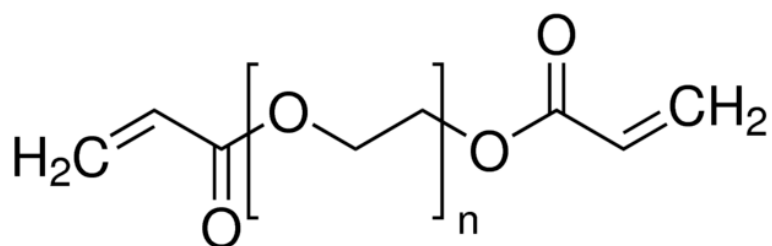

**Figure S5.** Structure of poly(ethylene glycol) diacrylate (PEGDA).

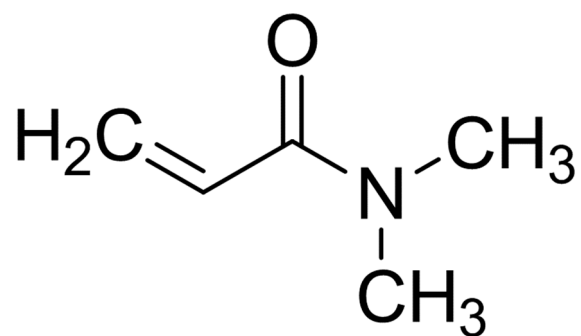

**Figure S6.** Structure of dimethyl acrylamide (DMAAm).

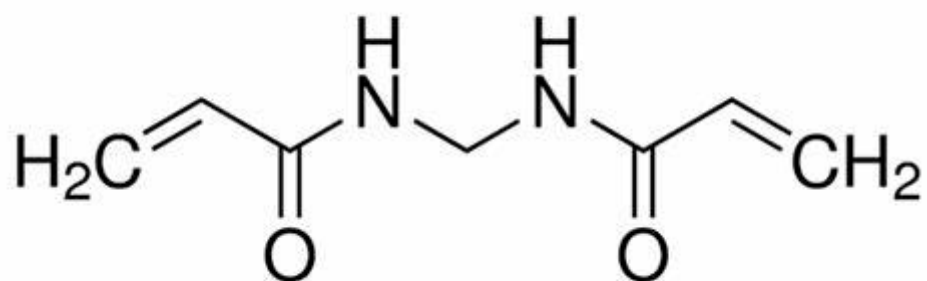

**Figure S7.** Structure of methylene bis-acrylamide (MBAAm).

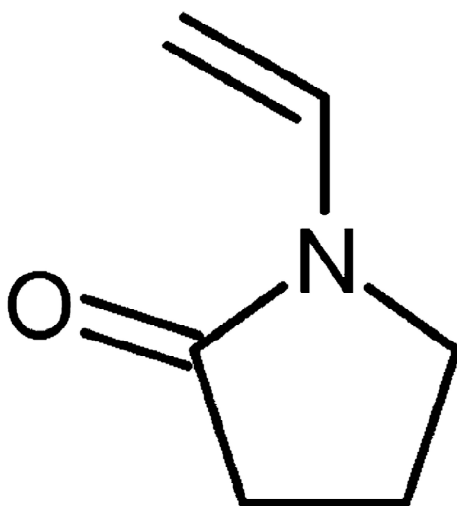

**Figure S8.** Structure of ninylpyrrolidone (NVP).

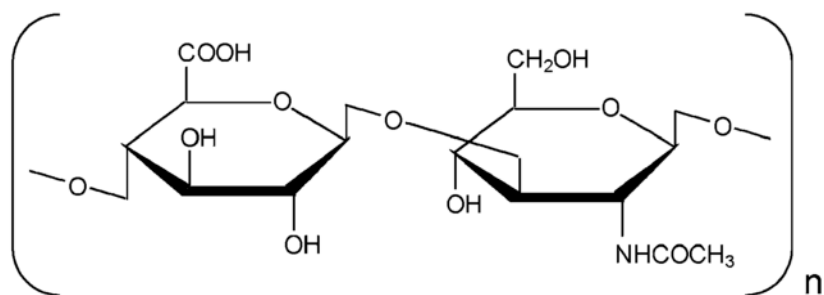

**Figure S9.** Structure of gelatin[4].

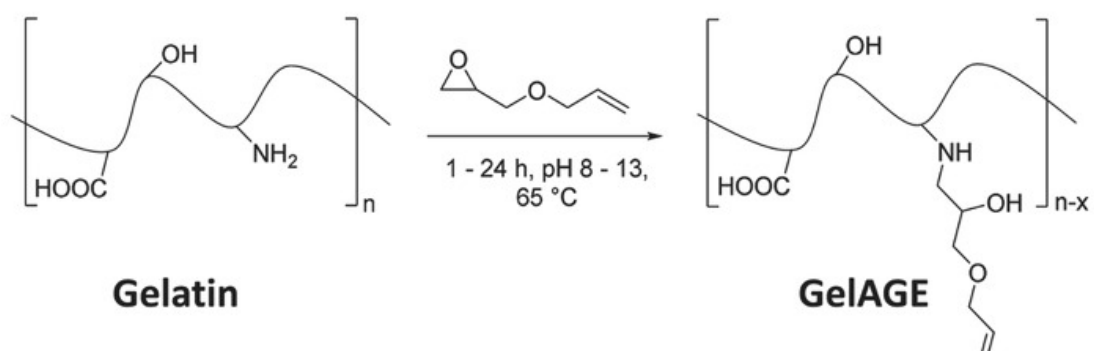

**Figure S10.** Synthetic routine of allyl glycidyl ether (AGE) modified gelatin [5].

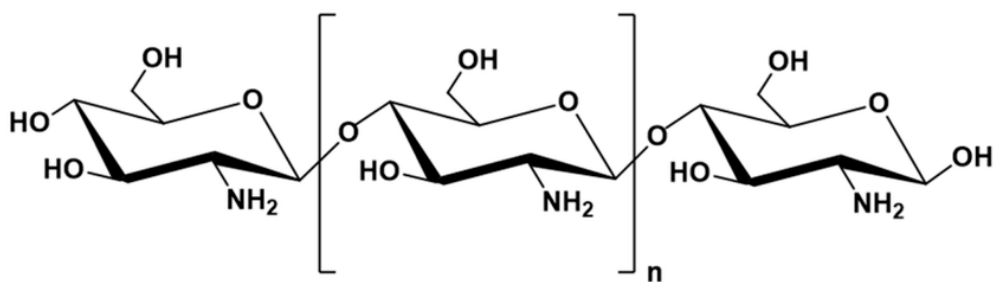

**Figure S11.** Structure of chitosan.

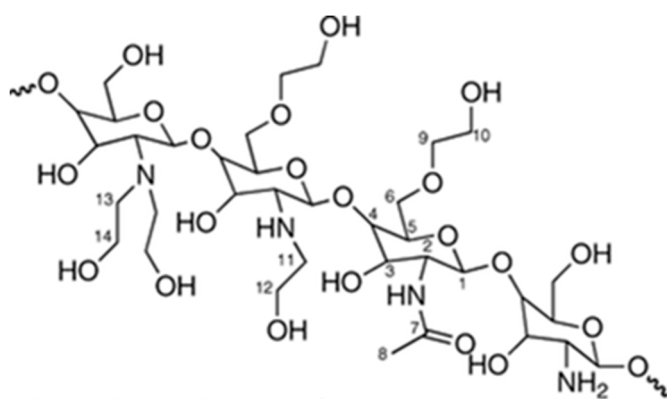

**Figure S12.** Structure of glycol chitosan (GC) [6].

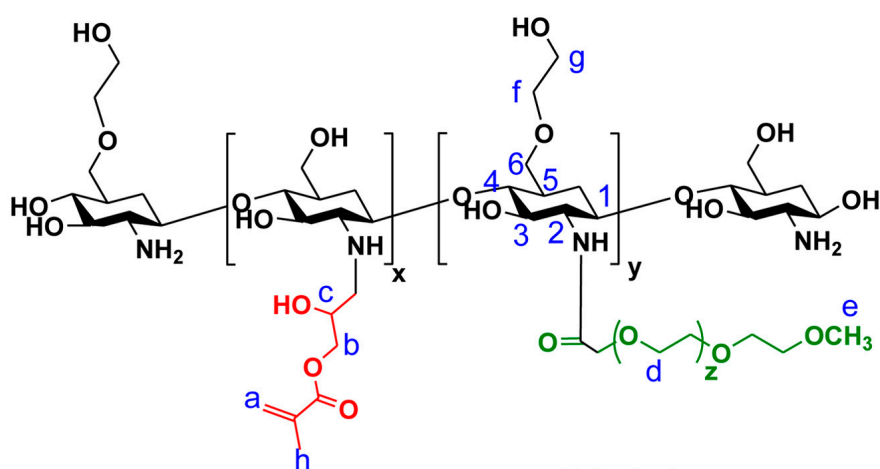

**Figure S13.** Structure of methacrylated GC (MeGC) [7].

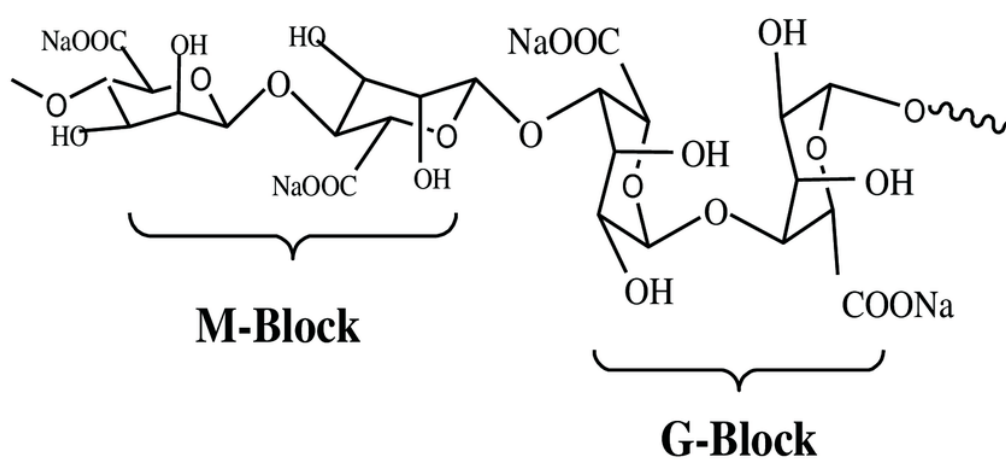

**Figure S14.** Structure of alginate [8].

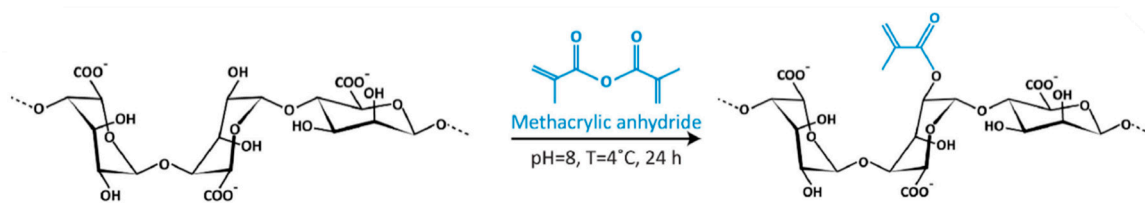

**Figure S15.** Synthetic routine of methacrylated alginate (Alg-MA) treating the secondary hydroxyl groups with MAA [9].

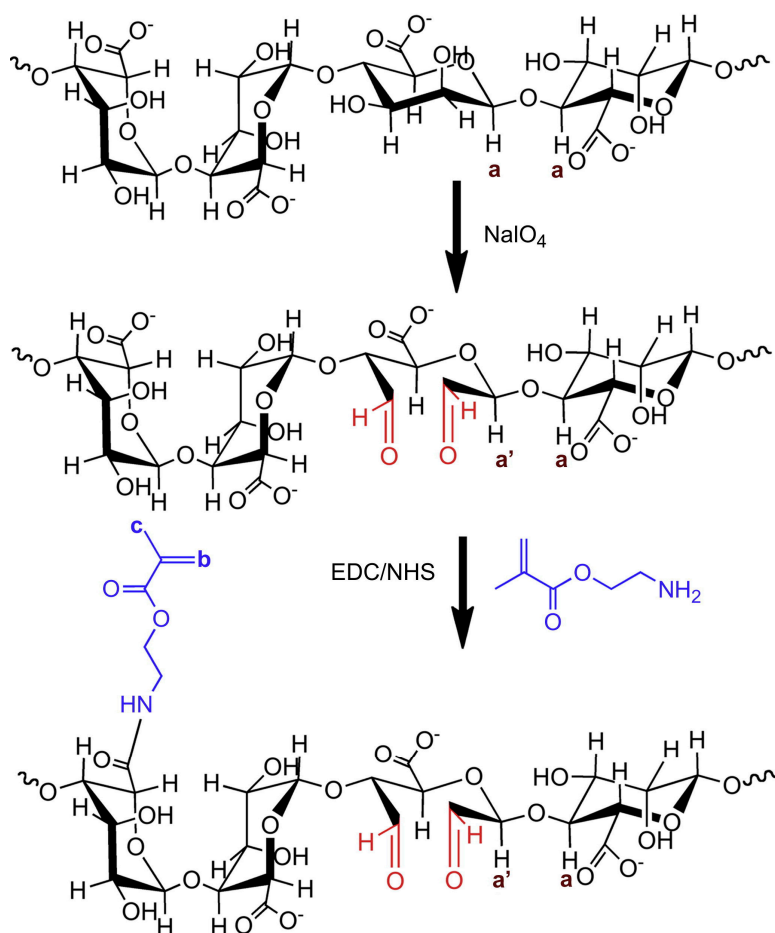

**Figure S16.** The synthetic routine of oxidized and methacrylated alginates (OMA) [10].



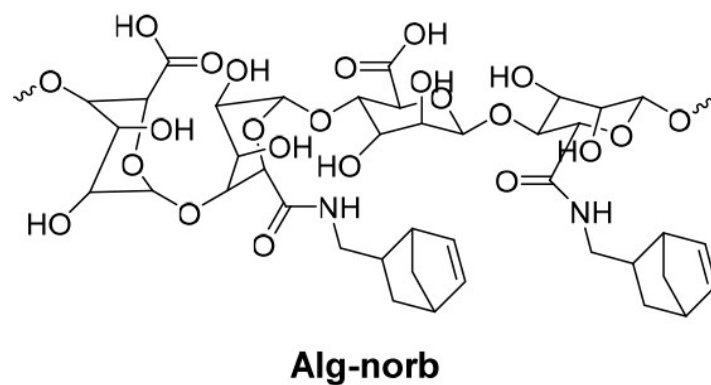

**Figure S17.** Structure of norbornene functionalized alginate[11].

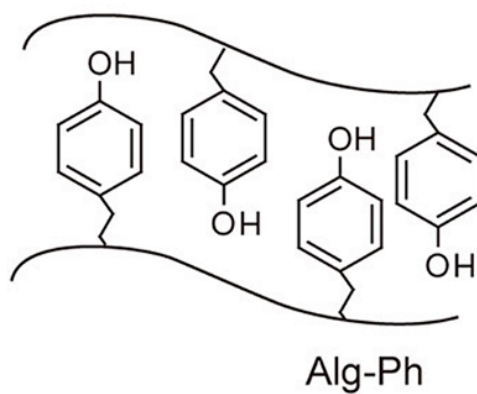

**Figure S18.** Structure of phenyl group functionalized alginate (Alg-Ph)[12].

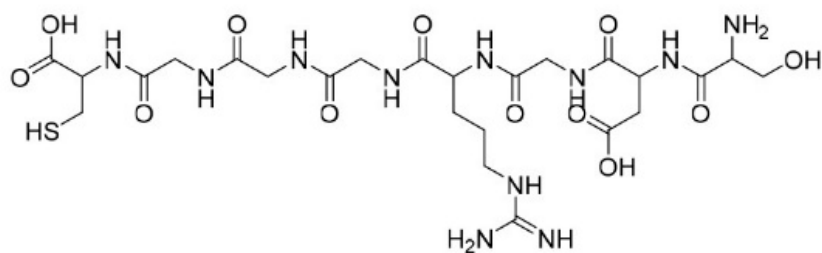

**Figure S19.** Structure of RGD Peptide Sequence (CGGGRGDS) [11].

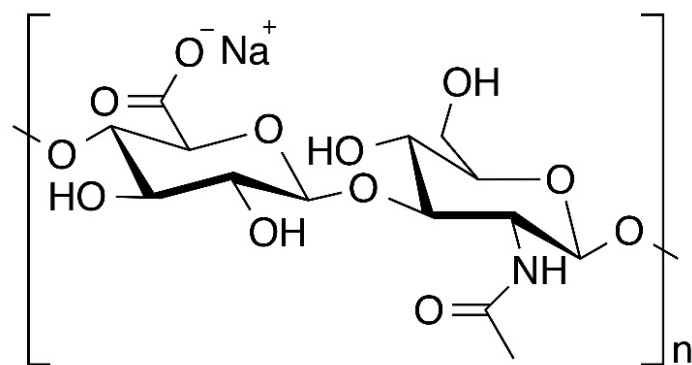

**Figure S20.** 1 Structure of hyaluronan N-acetyl-D-glucosamine and  $\beta$ -D-glucuronic acid linked by  $\beta$ -1,3 and  $\beta$ -1,4 glycosidic bonds.

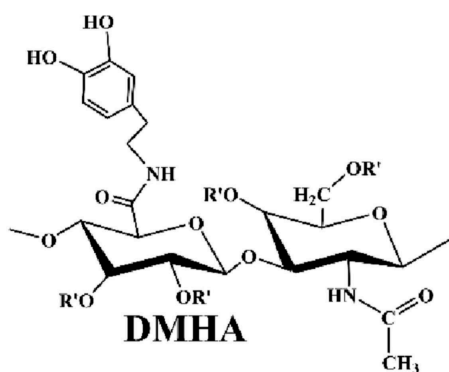

**Figure s21.** Structure of dopamine-conjugated maleic hyaluronic acid (DMHA) [13].

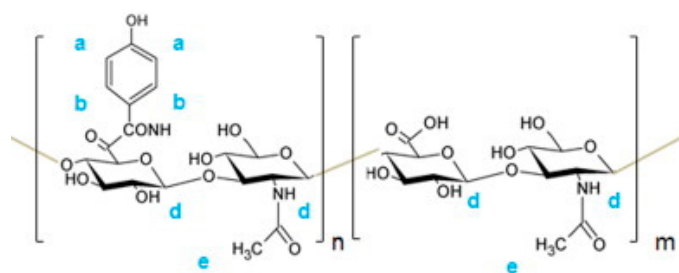

**Figure S22.** Structure of tyramine-functionalized hyaluronic acid (HA-Tyr) [14].

## References

1. Wan, T.; Fan, P.; Zhang, M.; Shi, K.; Chen, X.; Yang, H.; Liu, X.; Xu, W.; Zhou, Y., Multiple

- Crosslinking Hyaluronic Acid Hydrogels with Improved Strength and 3D Printability. *ACS Appl Bio Mater* **2022**, 5, (1), 334-343.
2. Vigata, M.; Meinert, C.; Pahoff, S.; Bock, N.; Hutmacher, D. W., Gelatin Methacryloyl Hydrogels Control the Localized Delivery of Albumin-Bound Paclitaxel. *Polymers (Basel)* **2020**, 12, (2).
  3. Zanon, M.; Chiappone, A.; Garino, N.; Canta, M.; Frascella, F.; Hakkarainen, M.; Pirri, C. F.; Sangermano, M., Microwave-assisted methacrylation of chitosan for 3D printable hydrogels in tissue engineering. *Materials Advances* **2022**, 3, (1), 514-525.
  4. Picard, J.; Giraudier, S.; Larreta-Garde, V., Controlled remodeling of a protein-polysaccharide mixed gel: examples of gelatin-hyaluronic acid mixtures. *Soft Matter* **2009**, 5, (21).
  5. Bertlein, S.; Brown, G.; Lim, K. S.; Jungst, T.; Boeck, T.; Blunk, T.; Tessmar, J.; Hooper, G. J.; Woodfield, T. B. F.; Groll, J., Thiol-Ene Clickable Gelatin: A Platform Bioink for Multiple 3D Biofabrication Technologies. *Adv Mater* **2017**, 29, (44), 1703404.
  6. Amsden, B. G.; Sukarto, A.; Knight, D. K.; Shapka, S. N., Methacrylated glycol chitosan as a photopolymerizable biomaterial. *Biomacromolecules* **2007**, 8, (12), 3758-66.
  7. Yang, D. H.; Seo, D. I.; Lee, D.-W.; Bhang, S. H.; Park, K.; Jang, G.; Kim, C. H.; Chun, H. J., Preparation and evaluation of visible-light cured glycol chitosan hydrogel dressing containing dual growth factors for accelerated wound healing. *Journal of Industrial and Engineering Chemistry* **2017**, 53, 360-370.
  8. Salisu, A.; Sanagi, M. M.; Abu Naim, A.; Wan Ibrahim, W. A.; Abd Karim, K. J., Removal of lead ions from aqueous solutions using sodium alginate-graft-poly(methyl methacrylate) beads. *Desalination and Water Treatment* **2015**, 57, (33), 15353-15361.
  9. Hasany, M.; Talebian, S.; Sadat, S.; Ranjbar, N.; Mehrali, M.; Wallace, G. G.; Mehrali, M., Synthesis, properties, and biomedical applications of alginate methacrylate (ALMA)-based hydrogels: Current advances and challenges. *Applied Materials Today* **2021**, 24.
  10. Jeon, O.; Alt, D. S.; Ahmed, S. M.; Alsberg, E., The effect of oxidation on the degradation of photocrosslinkable alginate hydrogels. *Biomaterials* **2012**, 33, (13), 3503-14.
  11. Ooi, H. W.; Mota, C.; Ten Cate, A. T.; Calore, A.; Moroni, L.; Baker, M. B., Thiol-Ene Alginate Hydrogels as Versatile Bioinks for Bioprinting. *Biomacromolecules* **2018**, 19, (8), 3390-3400.
  12. Sakai, S.; Komatani, K.; Taya, M., Glucose-triggered co-enzymatic hydrogelation of aqueous polymer solutions. *RSC Adv* **2012**, 2, (4), 1502-1507.
  13. Fan, P.; Dong, Q.; Yang, J.; Chen, Y.; Yang, H.; Gu, S.; Xu, W.; Zhou, Y., Flexible dual-functionalized hyaluronic acid hydrogel adhesives formed in situ for rapid hemostasis. *Carbohydr Polym* **2023**, 313, 120854.
  14. Loebel, C.; D'Este, M.; Alini, M.; Zenobi-Wong, M.; Eglin, D., Precise tailoring of tyramine-based hyaluronan hydrogel properties using DMTMM conjugation. *Carbohydrate Polymers* **2015**, 115, 325-333.
